# Supplementary material for: Natural gas facility methane emissions: measurements by tracer flux ratio in two US natural gas producing basins
Source: Oxford University Press journal article supplement (doi:10.1525/elementa.251), 2017-01-01
Supplement: elementa-5-251-s2.xlsx [file elementa-5-251-s2.xlsx]

## Sheet: FV basin
Natural Gas Basin	Site ID	Lower 95% Confidence Limit (kg hr-1)	CH4 Emission Rate (kg hr-1)	Upper 95% Confidence Limit (kg hr-1)	Throughput-Normalized Emission (%)	C2H6/CH4 enhancement ratio (%)	95% Confidence Interval on ratio (%)	Number of Plume Intercepts	Measurement duration (hh:mm)	Sector
FV	1	26.0612	71.17	116.28	0.0191211	5.67239	0.1846	5	01:49:12	transmission
FV	2	42.1623	57.9933	73.8254	0.157995	1.70863	0.086	10	02:45:29	gathering
FV	3	79.8897	103.222	126.556	0.255749	1.04076	0.222	5	01:04:52	gathering
FV	4	30.1993	42.6608	55.1231	0.224301	1.13312	0.113	8	01:13:41	gathering
FV	5	35.5258	88.2134	140.903	0.29258	1.28643	0.0385	5	01:30:48	gathering
FV	6	159.918	179.823	199.731	0.817817	1.26023	0.0455	14	01:25:23	gathering
FV	7	16.3719	26.573	36.7746	0.163829	1.20887	0.0333	9	01:31:38	gathering
FV	8	133.529	172.356	211.186		1.64356	0.0578	11	01:45:35	transmission
FV	9	4.36036	10.4654	16.5706	inf	3.97215	0.2518	4	00:34:59	transmission
FV	10	15.0808	17.9301	20.7798	0.289963	1.47148	0.1132	9	00:38:08	gathering
FV	11	2.20267	3.33552	4.46844	0.0880655	1.5241	0.0728	7	00:49:19	gathering
FV	12	26.6399	65.1088	103.579	0.18402	1.5124	0.0496	7	03:25:47	gathering
FV	13	13.0141	18.6972	24.3806	0.345222	1.58687	0.7314	11	02:42:59	gathering
FV	14	29.9934	37.6233	45.2539	0.18621	1.37165	0.0788	11	00:51:46	gathering
FV	15	41.1894	55.2593	69.3301	0.175442	1.45672	0.076	11	01:01:54	gathering
FV	16	0.238385	0.590058	1.51056	inf	1.95399	0.0559	1	00:02:23	transmission
FV	17	12.9627	22.3247	31.6872	0.0798374	0.98691	0.1179	8	00:51:36	gathering
FV	18					1.55849	0.0669	0	01:45:59	gathering
FV	19	29.7037	38.1878	46.6725	0.166097	1.43196	0.0535	9	01:59:00	gathering
FV	20 partial	369.11	633.118	897.137		1.26624	0.0669	9	03:18:10	gathering
FV	20	369.11				1.26624	0.0669	9	03:18:10	gathering
FV	21	0	7.13926	14.2977	0.113364	1.34923	0.0455	5	01:01:59	gathering
FV	22	15.1599	21.5472	27.9349	0.117169	1.55356	0.2745	4	00:28:37	gathering
FV	23	13.6045	17.7347	21.8652	0.425537	1.68895	0.2597	7	00:59:33	gathering
FV	24	0	0.858023	7.98475	0.0217475	1.82187	0.5465	2	01:31:47	gathering
FV	25	33.9419	51.3811	68.8212	0.19334	1.44827	0.0662	11	01:32:03	gathering
FV	26	9.6887	14.9733	20.2583	0.121661	1.36988	0.152	12	00:36:41	gathering
FV	27	40.5564	51.0343	61.513	0.145676	1.33171	0.1035	8	00:25:57	gathering
FV	28	37.8164	47.6249	57.4342	0.228017	1.2971	0.1385	11	01:15:47	gathering
FV	29	5.39552	16.2306	27.0659	0.0745845	1.5752	0.0899	12	02:22:31	gathering
FV	30	55.3567	65.0013	74.6471	0.244806	1.156	0.0591	12	01:21:32	gathering
FV	31	90.6704	188.782	286.897	0.352639	1.2949	0.0671	9	02:27:11	gathering
FV	32	80.5416	95.9648	111.39	0.260932	1.1435	0.2128	4	00:54:54	gathering
FV	33	11.4913	16.1091	20.7271	0.0819859	1.1302	0.1224	3	00:24:59	gathering
FV	34	1.18678	1.62696	2.06717	0.121755	1.0354	0.0648	10	00:23:19	production
FV	35	0	0.0400264	0.0864658	0.0424183			7	00:56:36	production
FV	36	0	0.482256	1.10054	0.242581			5	00:48:03	production
FV	37							0	00:51:06	production
FV	38	0	0.647857	1.52221	0.054281	1.2739	0.1566	4	01:29:00	production
FV	39	0.389023	0.884488	1.37997	0.0862987	0.9922	0.0695	6	01:12:09	production
FV	40	0	0	11.7216	0			5	00:36:05	production
FV	41	0	0	0.741315	0			4	00:55:27	production
FV	42	0.425786	1.32555	2.22534	0.120935	1.109	0.1249	5	00:44:00	production
FV	43	0	1.52836	3.26735	0.0808673	1.3018	0.8293	5	01:37:47	production
FV	44	5.05064	8.26093	11.4714	6.85561	1.5657	0.3503	7	01:51:14	production
FV	45	0.214141	0.382819	0.551503	0.107695	2.0607	0.3903	11	00:55:52	production
FV	46	0.152219	0.256599	0.360984	0.129617	1.624	0.0666	7	00:50:04	production
FV	47	2.08057	2.88438	3.68823	0.320697	1.4688	0.1588	11	00:25:35	production
FV	48	0.0416258	1.32052	2.59945	1.09962	1.3299	0.2717	6	00:24:52	production
FV	49	0.443074	0.886075	1.32909	0.0725215	1.6881	0.3155	6	01:01:11	production
FV	50	592.031	802.122	1012.23	152.004	1.4356	0.0341	7	00:44:58	production
FV	51	0	0	2.70825	0	1.1641	0.2039	10	01:17:41	production
FV	52	8.03778	10.5499	13.0623	0.108805	1.4473	0.191	10	00:45:56	gathering
FV	53	143.398	181.644	219.893	0.907361	1.4298	0.0459	6	01:18:28	gathering
FV	54	47.1697	54.3249	61.481	0.217512	1.4534	0.0969	6	00:30:44	gathering

## Sheet: DJ basin
Natural Gas Basin	Site No.	Lower 95% Confidence Limit (kg hr-1)	CH4 Emission Rate (kg hr-1)	Upper 95% Confidence Limit (kg hr-1)	C2H6/CH4 enhancement ratio (%)	95% Confidence Interval on ratio (%)	Number of Plume Intercepts	Measurement duration (hh:mm)	Sector
DJ	1	8.1816	11.548	16.1208	16.3487	0.5738	1	00:01:13	gathering
DJ	2	0.569044	5.735	10.9019	16.3709	0.2323	5	00:29:20	gathering
DJ	3	2.82123	5.743	10.696	12.5266	0.4258	1	00:02:04	gathering
DJ	4	0.967172	1.365	1.90569	21.7982	0.5251	1	00:01:59	gathering
DJ	5	5.48826	25.072	44.6558	14.5792	0.2914	2	01:12:10	gathering
DJ	6	9.08271	12.819	17.8964	13.7122	0.193	1	00:01:08	gathering
DJ	7	38.5836	101.889	165.195	38.8089	5.0375	4	00:16:26	processing
DJ	8	11.6009	44.1	76.5982	17.2334	0.1388	5	00:20:23	gathering
DJ	9	1.72207	2.431	3.39312	14.5808	3.9723	1	00:00:51	processing
DJ	10	9.85989	20.072	33.9021	15.0422	1.5934	1	00:01:09	processing
DJ	11	42.574	79.321	116.067	5.1572	0.1258	3	00:44:33	processing
DJ	12	8.97026	10.05	11.1304	16.7577	2.2443	5	00:23:47	production
DJ	13	62.1515	74.26	86.3693	20.9552	0.7417	5	00:47:17	production
DJ	14	44.1245	67.283	90.4415	37.2351	1.895	5	01:11:42	production
DJ	15	0	12.002	26.4812	10.9515	0.2905	4	01:04:58	gathering
DJ	16	8.082	13.381	18.6809	20.9484	0.1335	1	00:01:04	production
DJ	17	5.3306	6.342	7.35286	17.0317	0.5441	3	00:47:58	gathering
DJ	18	4.46633	13.412	22.3576	5.6935	2.0796	5	00:28:04	gathering
DJ	19	0	0.18	0.941895			2	00:03:55	gathering
DJ	20	3.34725	8.462	13.5772	16.9847	0.304	4	00:38:49	gathering
DJ	21	0.509383	2.332	4.15462	28.6914	4.2202	4	03:20:14	production
